# Supplementary material
Source: publisher figshare collection journal article supplement (https://gsapubs.figshare.com/articles/dataset/_/21676967)
Supplement: Supplementary file 1 [file 1]

Rongguo Zheng, Jin Zhang, and Wenjiao Xiao, 2022, Continental crust delamination in a retreating subduction zone: A case study in the southern Alxa (Inner Mongolia, China), Central Asian Orogenic Belt: GSA Bulletin, <https://doi.org/10.1130/B36712.1>.

## Supplemental Material

**Table S1.** Zircon U-Pb analytical data of Shouji plutons in the southern Alxa.

**Table S2.** Zircon Hf isotopic compositions of Shouji plutons in the southern Alxa.

**Table S3.** Major and trace elements compositions of Shouji plutons in the southern Alxa.

**Table S4.** Whole rock Rb-Sr and Sm-Nd isotopic compositions of Shouji plutons in the southern Alxa.

**Supplemental Text.** Analysis methods.
